# Supplementary material for: A paraelectric–ferroelectric phase transition of an organically templated zinc oxalate coordination polymer
Source: Royal Society of Chemistry journal article supplement (doi:10.1039/c8dt02859a), 2018-01-01
Supplement: c8dt02859a1.pdf [file c8dt02859a1.pdf]

Supporting information for

## A paraelectric - ferroelectric phase transition of organically templated zinc oxalate coordination polymer

Katarzyna Pasińska\*, Anna Piecha-Bisiorek, Vasyl Kinzhybalov, Agnieszka Ciżman, Anna Gągor and Adam Pietraszko

[\*] K. Pasińska, Dr. V. Kinzhybalov, Dr. A. Gągor, Prof. A. Pietraszko

Institute of Low Temperature and Structure Research, Polish Academy of Sciences, Okólna 2, 50-422 Wrocław, Poland

Dr. A. Piecha-Bisiorek

University of Wrocław, Faculty of Chemistry, 14 F. Joliot-Curie, 50-383 Wrocław, Poland

Dr. A. Ciżman

Wrocław University of Science and Technology, Department of Experimental Physics, 27 Wybrzeże Wyspiańskiego, 50-370 Wrocław, Poland.

E-mail: k.pasinska@int.pan.wroc.pl

## Synthesis and crystal growth

Zn(CH<sub>3</sub>COO)<sub>2</sub> (99%, ChemPur), H<sub>2</sub>C<sub>2</sub>O<sub>4</sub> · 2H<sub>2</sub>O (99.8%, ChemPur), 1,4-diazoniabicyclo[2.2.2]octane (99.5%, Sigma-Aldrich) and agar (Fisher Scientific) were commercially available, reagent grade, and used without further purification. The growth of the metal oxalate in the presence of structure-directing organic amine (1,4-diazoniabicyclo[2.2.2]octane, denoted as DABCO) was carried out by double diffusion technique described by Henisch [1]. For this purpose, a glass U-tube of size 15 cm in length and 6 cm in diameter was used as crystallization vessel.

Agar gel solution was prepared by mixing 1.0 g of agar powder in 100 ml double distilled water at boiling. Obtained gel was poured to the U-tube and allowed to set for a 2h. Then an aqueous solution of metal salt was gently added to the first limb, while the solution of 1,4-diazoniabicyclo[2.2.2]octane and oxalic acid to the another one. The U-tube was sealed and kept undisturbed under ambient conditions. After several weeks, a needla-like, single crystals of a suitable size for X-ray analysis had formed in the gel.

## Elementar anlysis

**DZnOH:** Found: C, 29.5; H, 4.7; N, 6.9. Calc. for C<sub>10</sub>H<sub>20</sub>N<sub>2</sub>O<sub>11</sub>Zn: C, 29.3; H, 4.9; N, 6.8 %.

## Differential Scanning Calorimetry

Differential scanning calorimetry (DSC) measurements of obtained crystals were performed on a DSC-7 instrument (PerkinElmer) at a rate of 20 K min<sup>-1</sup> under a nitrogen atmosphere with two cycles in the temperature range 313 – 103 K.

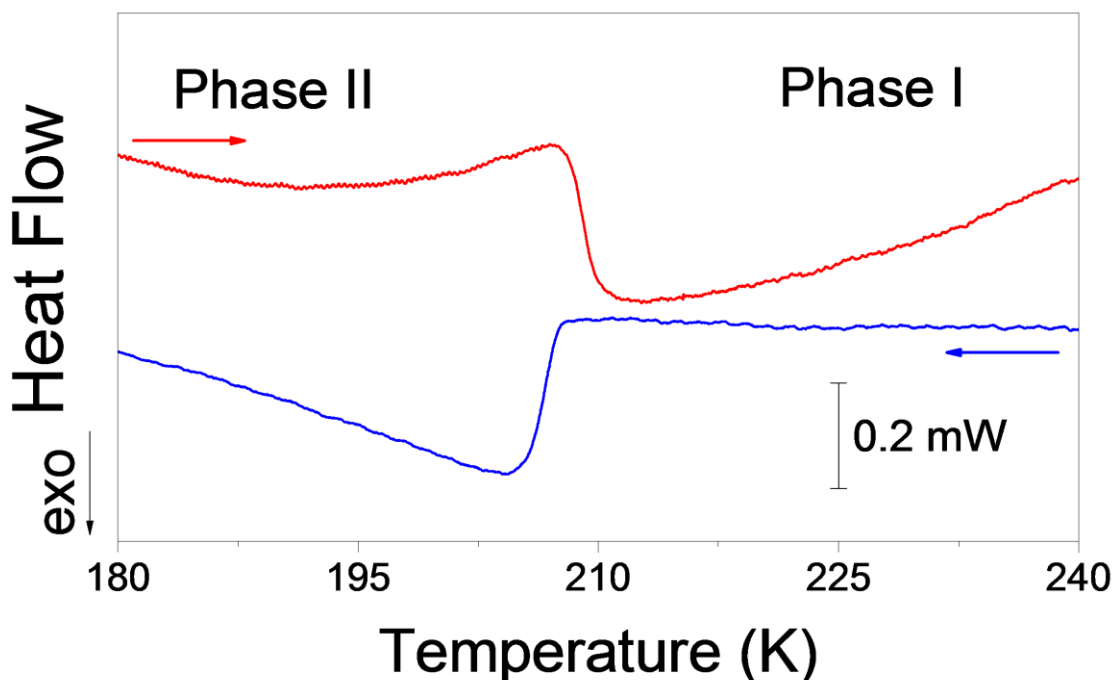

Figure S1. DSC curves (with the ramp rate of 20 K min<sup>-1</sup>, sample mass 24.137 mg) for the DZnOH.

The specific heat measurements were made using a Mettler Toledo DSC-1 calorimeter, with a heating rate of 10 K min<sup>-1</sup> and with a resolution of 0.4 mW.

The latent heat corresponding to the phase transition was calculated by subtraction from the data the baseline representing net specific heat. The entropy related to the phase transition was calculated by performing tabular integrations of  $\int \frac{\Delta C_p}{T} dT$ . The shape of the entropy (see Figure S2) and its value suggests both displacive and order-disorder contribution to the phase transition mechanism. An entropy change ( $\Delta S$ ) is estimated with a value of 1.5 J mol<sup>-1</sup> K<sup>-1</sup>. Given that  $\Delta S = R \ln N$  where R is the gas constant and N is the ratio of possible atoms configuration it was found that N=1.197.

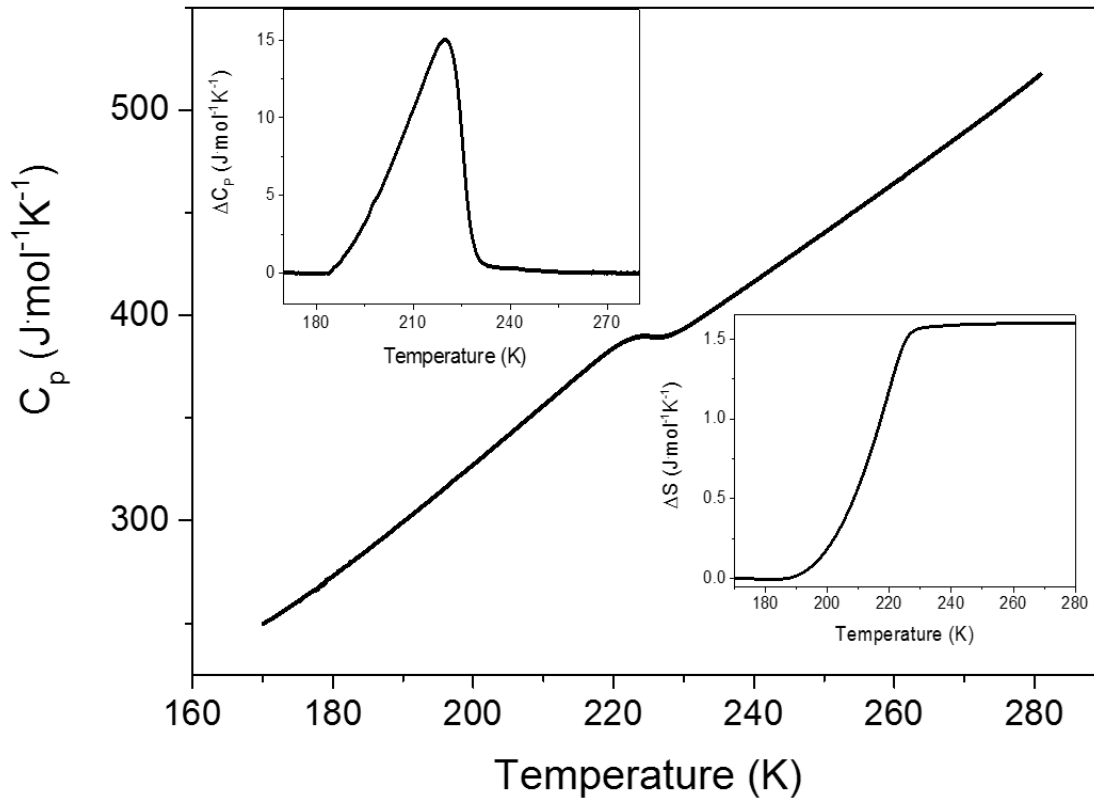

Figure S2. Specific heat of DZnOH measured in heating mode. The insets show the latent heat ( $\Delta C_p$ ) and entropy  $\Delta S$  related to the phase transition

The calculated polarization  $P_{\text{cal}}$  (Figure S3) is about 5 times greater than the polarization value estimated from both pyroelectric and spontaneous polarization measurements. The discrepancies can result from a worse quality of crystal sample used in the pyroelectric and spontaneous polarization measurements or/and the investigated crystals were not fully monodomain.

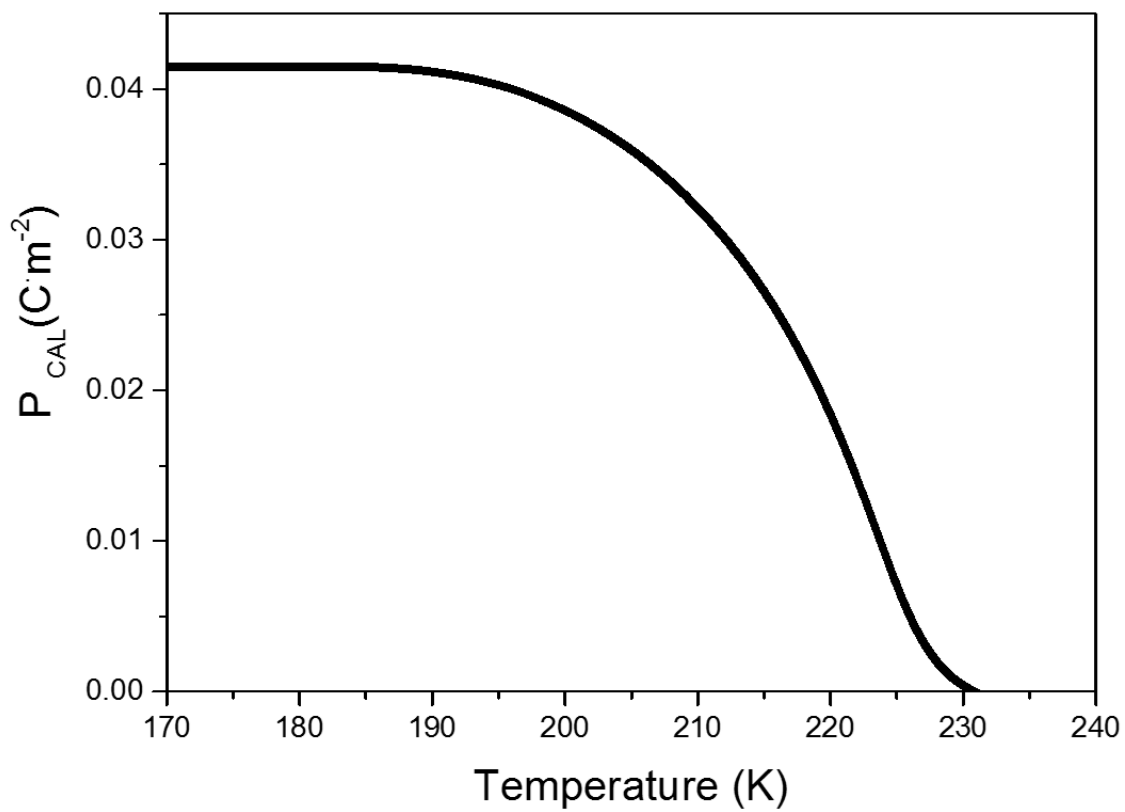

Figure S3. Temperature dependence of the spontaneous polarization calculated from  $P_s^2(T) = \int \frac{2\Delta C_p}{\alpha T} dT$

Thermogravimetric analysis

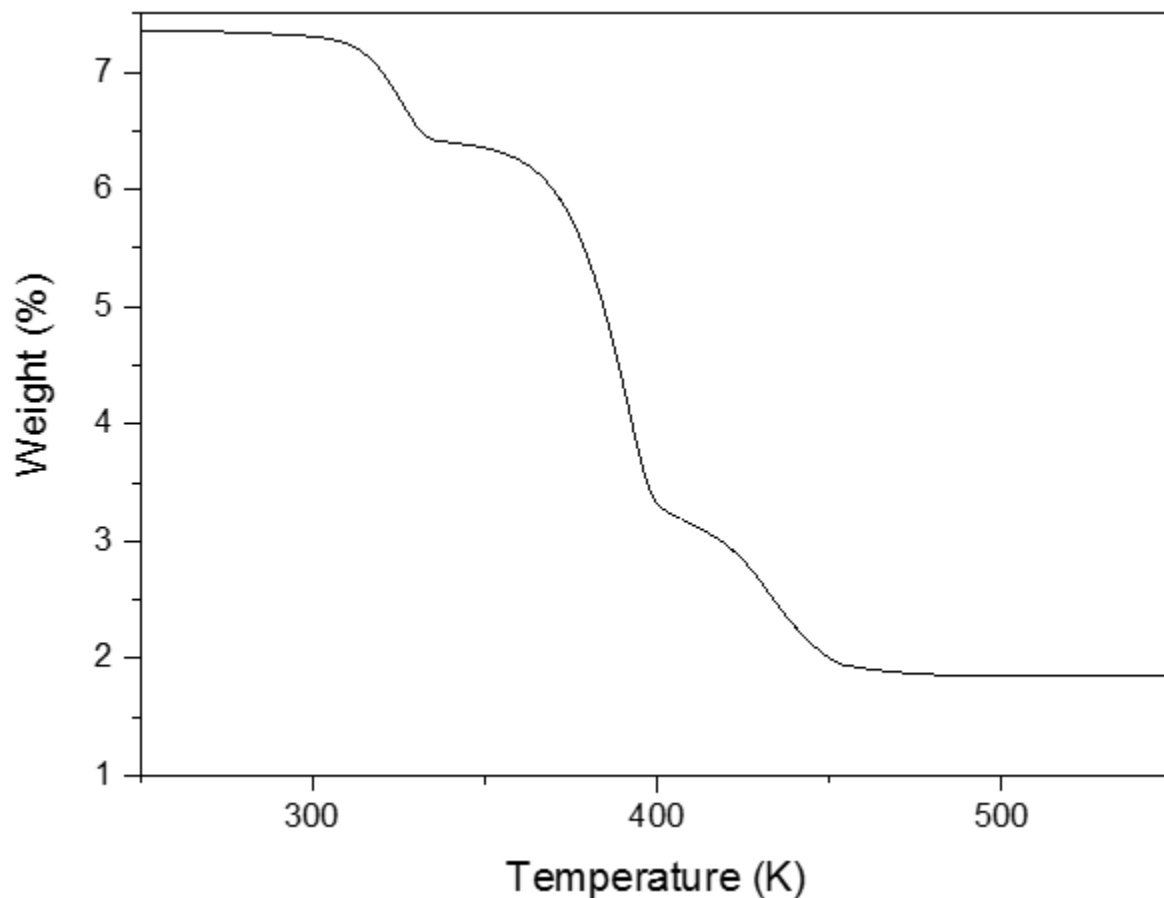

Figure S4. Thermogravimetric analysis (with the ramp rate of 10 K min<sup>-1</sup>, sample mass 8.331 mg) for the DZnOH.

Table S1. Thermogravimetric analysis.

|                                                     |            | <b>DZnOH</b> |
|-----------------------------------------------------|------------|--------------|
| <b>3H<sub>2</sub>O</b>                              | Calculated | 13.20 %      |
|                                                     | Observed   | 11.78 %      |
| <b>3CO<sub>2</sub> + CO,<br/>H<sub>2</sub>dabco</b> | Calculated | 66.24 %      |
|                                                     | Observed   | 64.21 %      |
| <b>MeO</b>                                          | Calculated | 19.87 %      |
|                                                     | Observed   | 23.14 %      |

#### Dielectric studies

The complex dielectric permittivity  $\epsilon^* = \epsilon' - i\epsilon''$  was measured using an Agilent 4284A Precision LCR meter in the frequency range between 100 Hz and 2 MHz and in the temperature range from

100 to 300 K. The overall error was less than 5%. Silver electrodes were stuck on the opposite faces. The dielectric measurements were carried in a controlled atmosphere ( $N_2$ ).

Pyroelectric current was measured by Keithley 617 Electrometer. The spontaneous polarization was obtained by a numerical integration of the current vs. time curve and dividing by the sample area. In order to check the effect of external electric field on the value and orientation of the spontaneous polarization vector, DCV supply was used. The experiment was performed in such a way that the sample was first polarized in the phase I and then cooled below 207 K. After half an-hour of shorting the sample, the pyroelectric current was measured on heating. We used the electric field intensity as large as  $\pm 5 \text{ kV cm}^{-1}$  in the first and second experiment, respectively.

Ferroelectric hysteresis loops measurements were performed using a homemade high precision set-up base on Diamand-Drenck-Pepinsky (DDP) bridge.

#### Powder X-Ray Diffraction

The phase purity of title compound was confirmed by powder X-ray diffraction (XRD). The diffraction pattern was collected in the reflection mode at Bragg–Brentano geometry in 2-theta range from 5 to 50 with a scan step of 0.026 deg during 1 h. An X'Pert PRO X-ray diffraction system with  $CuK_{\alpha}$  radiation equipped with a PIXcel ultra-fast line detector, focusing mirror and Soller slits for  $Cu K_{\alpha}$  radiation ( $\lambda = 1.54056 \text{ \AA}$ ) was used (see Figure S3).

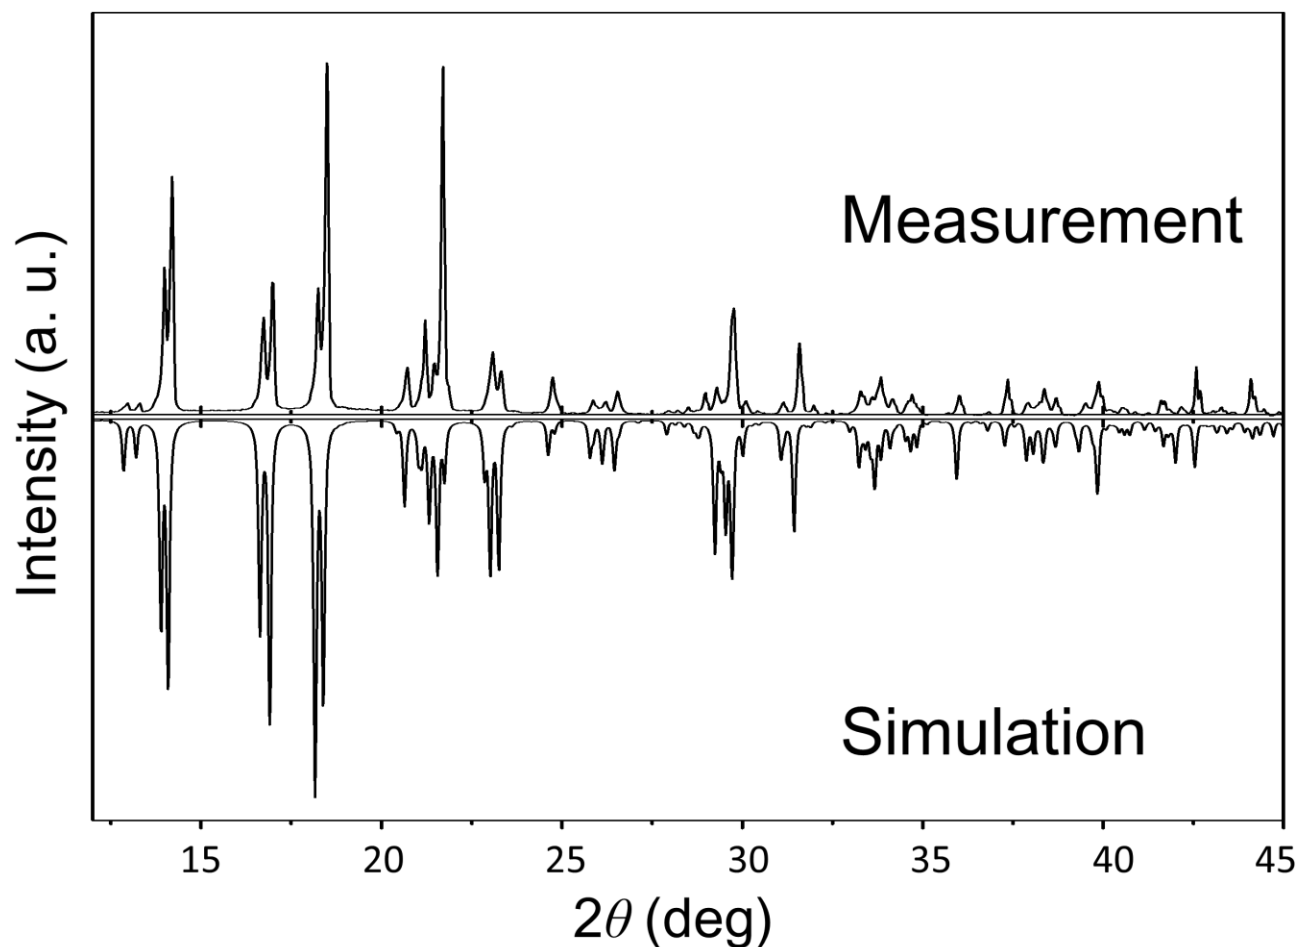

Figure S5. Powder XRD patterns for the as-prepared bulk sample DZnOH (up) together with the calculated ones based on the single crystal structure at room temperature (down).

#### Single-crystal X-ray diffraction

A suitable single crystal for a good data collection was selected under a polarized light microscope and glued onto a thin glass fibre by two-part epoxy adhesive. Single-crystal X-ray diffraction data were collected in wide temperature range, 100–300 K using an Xcalibur Atlas four-circle diffractometer equipped with a two-dimensional CCD detector. The graphite monochromated MoK $\alpha$  radiation ( $\lambda = 0.71073 \text{ \AA}$ ) was used.



The data frames were reduced and corrected for absorption effects using the CrysAlisPro RED software version 1.171.38.34a (Oxford Diffraction). Final unit cell parameters were determined by least squares refinement of reflections from the data set. Direct methods structure solution, difference Fourier calculations, and full-matrix least squares refinement against  $F^2$  were performed with SHELXS and SHELXL-2014/7 using OLEX 2.52 software.

Hydrogen atoms were placed in geometric positions (C–H  $\sim$  0.97 Å, N–H  $\sim$  0.91 Å and O–H  $\sim$  0.85 Å) and treated as riding atoms. The isotropic atomic displacement parameters of the H atoms,  $U_{iso}(\text{H})$  were set to be equal to 1.2 times the thermal parameters of the corresponding parent atoms,  $1.2 U_{eq}$ . Water H atoms were located firstly in a difference Fourier map and were then fixed, with O–H  $\sim$  0.85 Å and  $U_{iso}(\text{H}) = 1.5 U_{eq}(\text{O})$ .

The details of selected data collection and refinement parameters along with the crystal description are briefly summarized in Table S3.

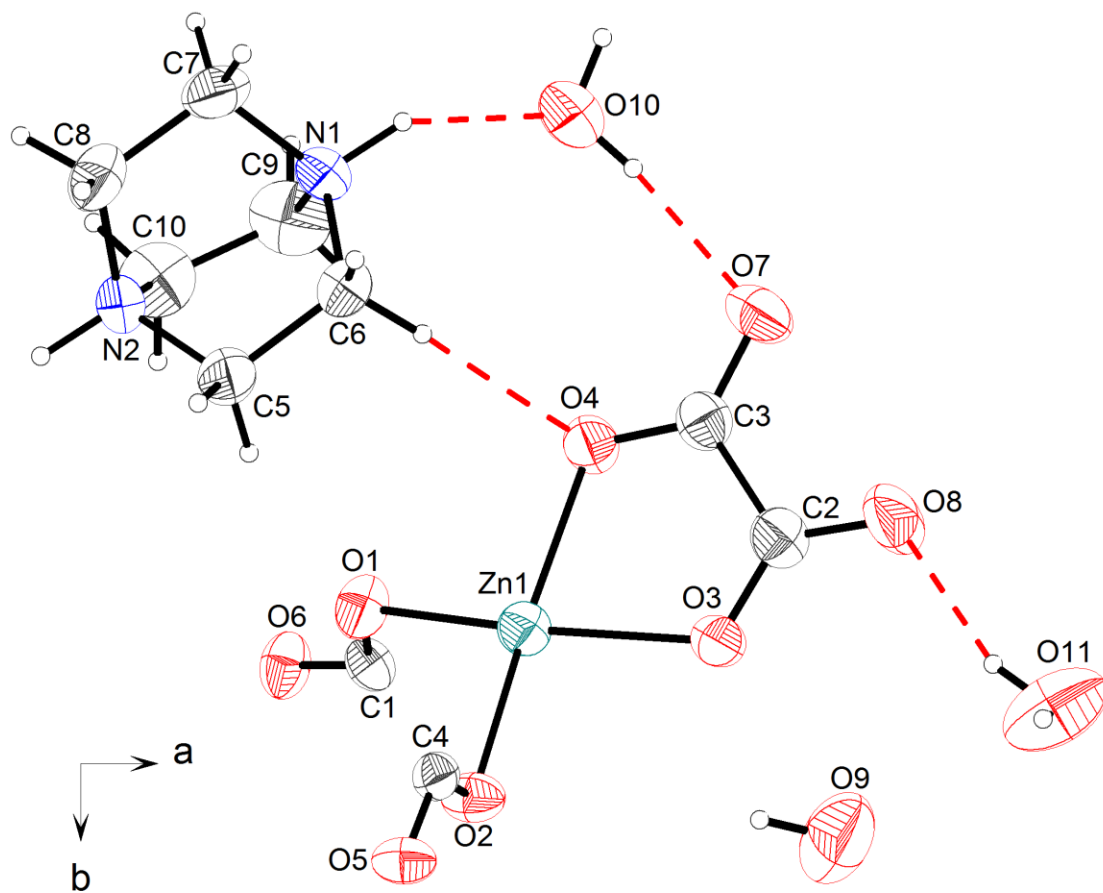

Figure S6. The asymmetric unit cell of phase I, showing the atom-numbering scheme. The labels of hydrogen atoms were omitted for clarity. Displacement ellipsoids are drawn at the 50% probability level. Hydrogen bonds are denoted by red dashed lines.

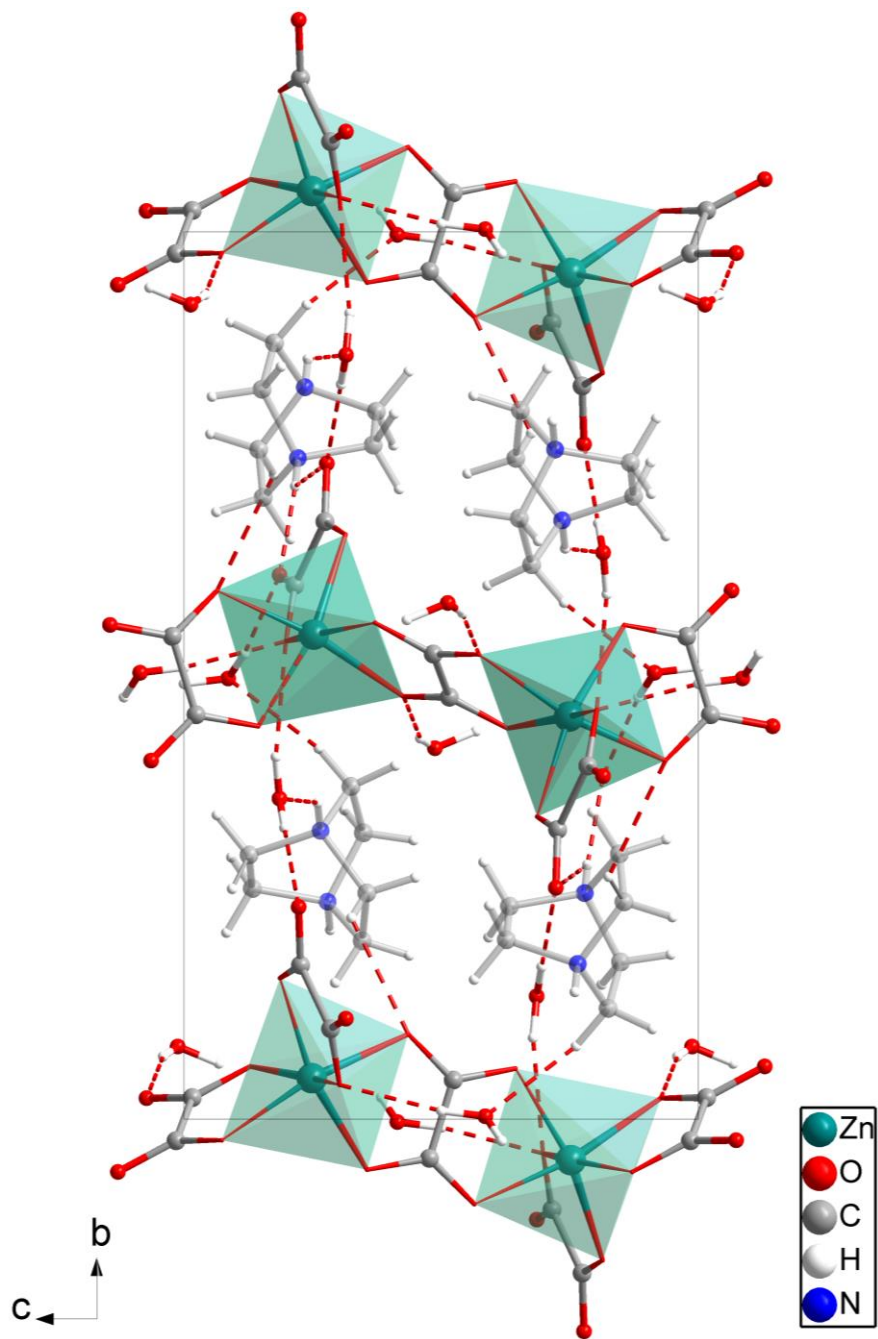

Figure S7. Packing diagram for phase I viewed along [100] showing the three-dimensional hydrogen bonded network (red dashed lines). Colour key: [ZnO<sub>6</sub>] – cyan, oxygen – red, nitrogen – blue, carbon – grey, hydrogen – white.

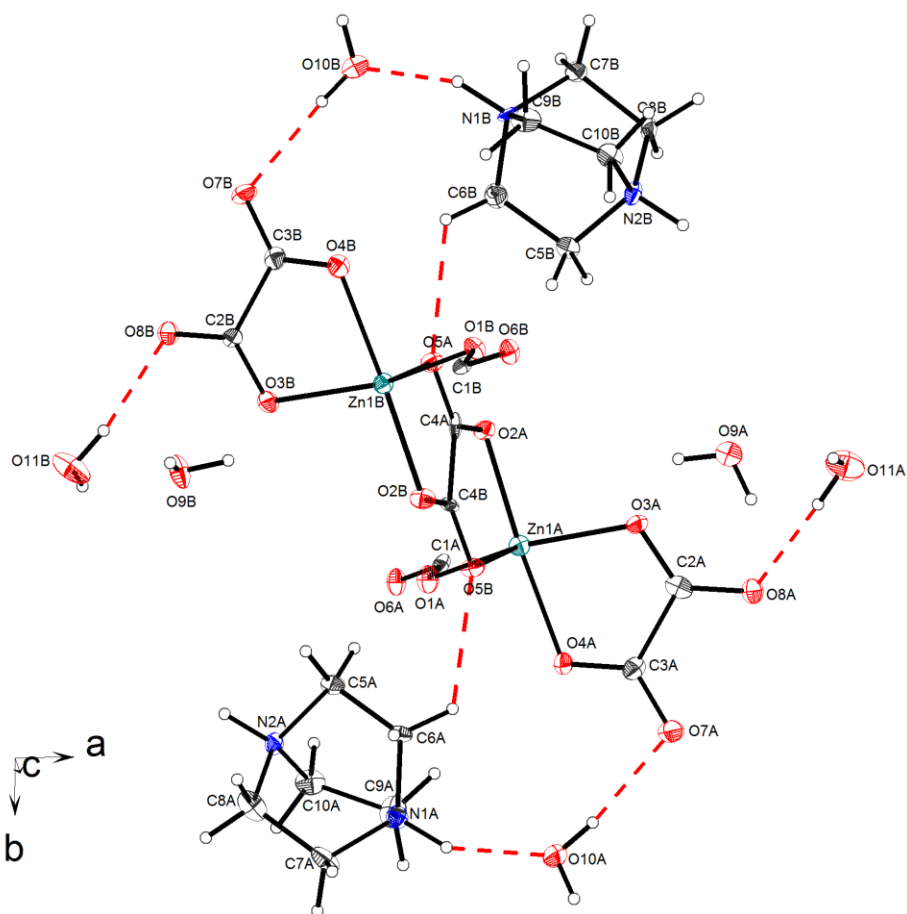

Figure S8. The asymmetric unit cell of phase II, showing the atom-numbering scheme. The labels of hydrogen atoms were omitted for clarity. Displacement ellipsoids are drawn at the 50% probability level. Hydrogen bonds are denoted by red dashed lines.

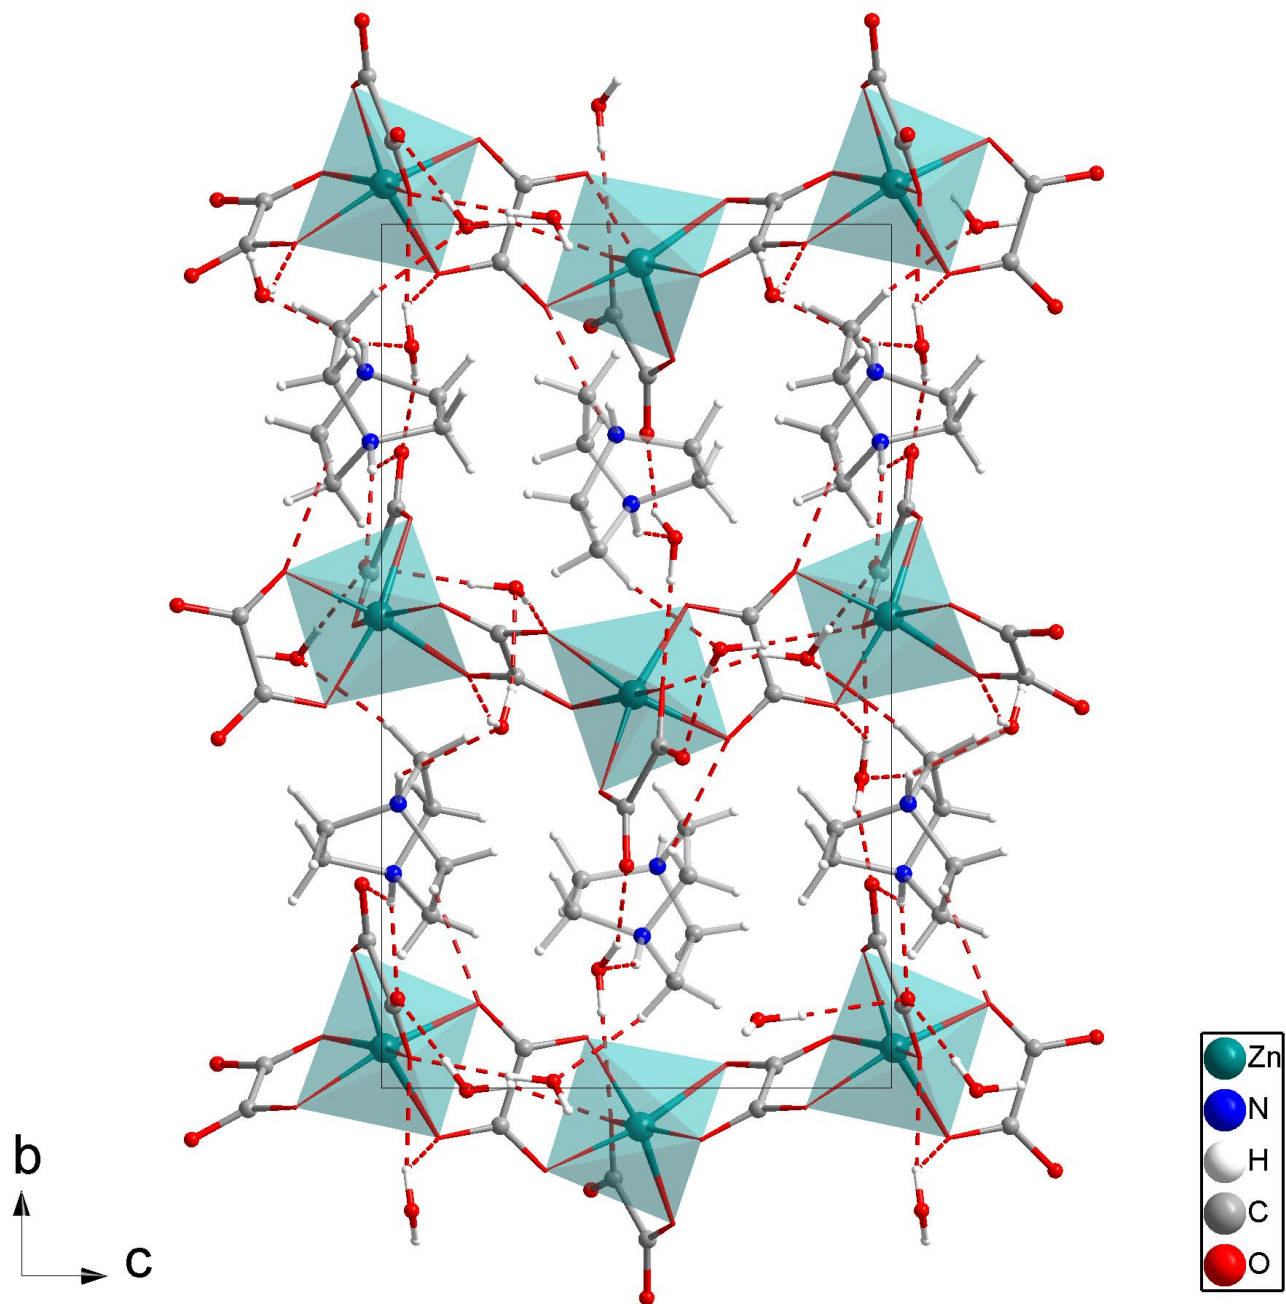

Figure S9. Packing diagram for phase II viewed along [100] showing the three-dimensional hydrogen bonded network (red dashed lines). Colour key:  $[\text{ZnO}_6]$  – cyan, oxygen – red, nitrogen – blue, carbon – grey, hydrogen – white.

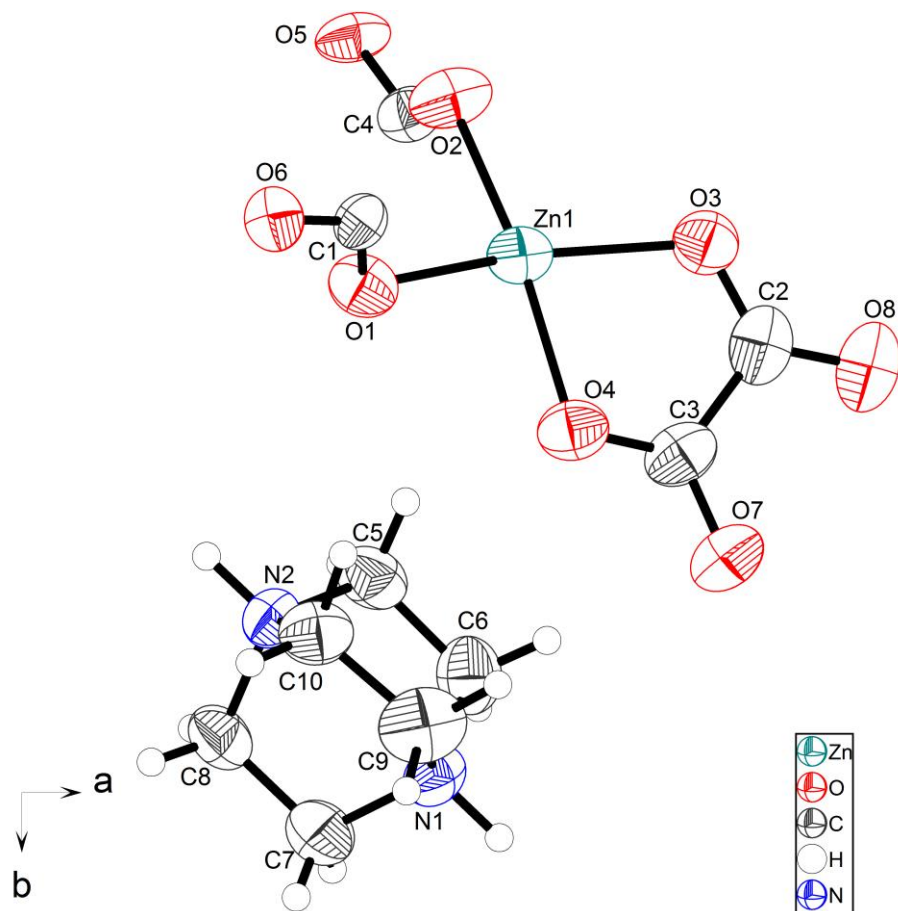

Figure S10. The asymmetric unit cell of  $(\text{DABCOH}_2)[\text{Zn}(\text{C}_2\text{O}_4)_2]$  (DZnO), showing the atom-numbering scheme. The labels of hydrogen atoms were omitted for clarity. Displacement ellipsoids are drawn at the 50% probability level.

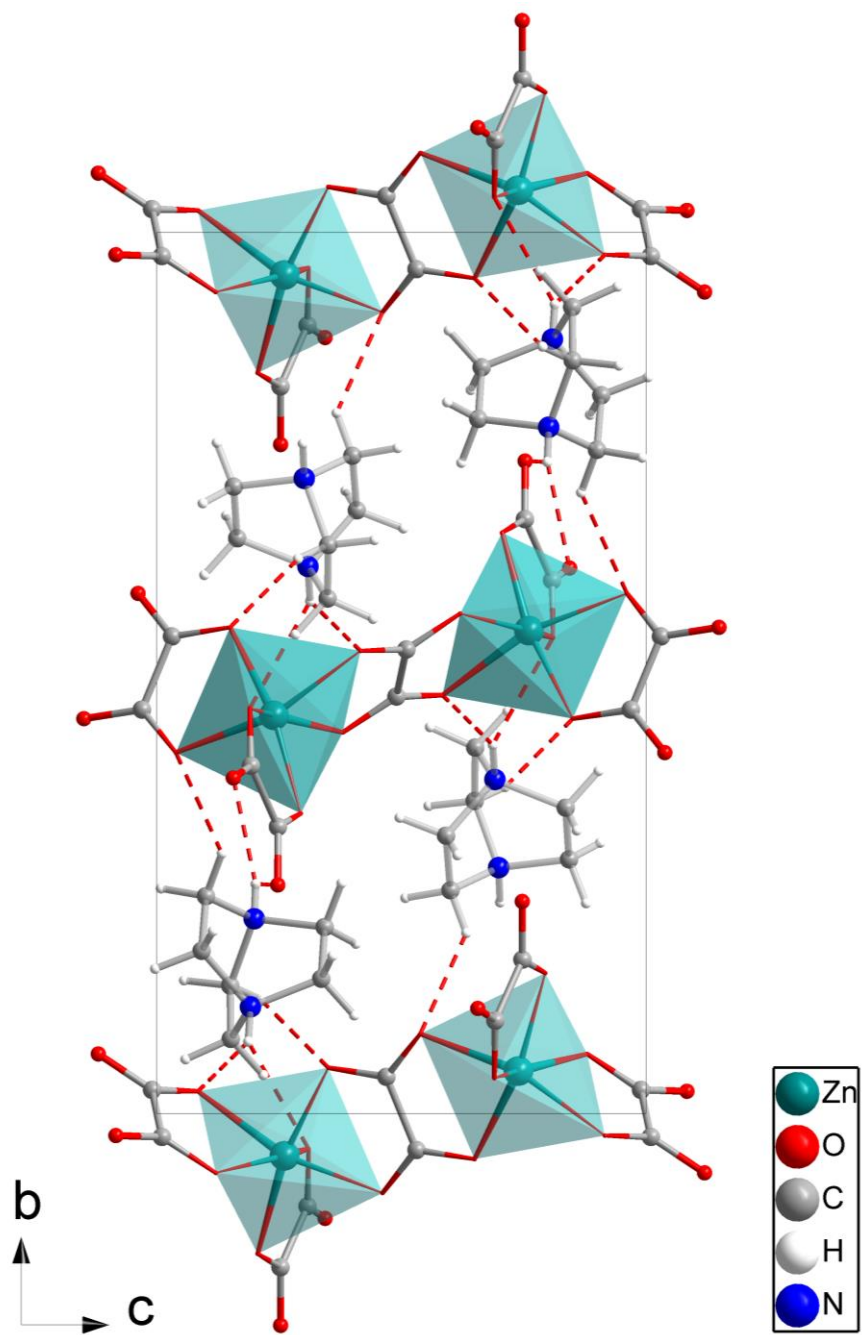

Figure S11. Packing diagram for phase II viewed along [100] showing the three-dimensional hydrogen bonded network (red dashed lines). Colour key: [ZnO<sub>6</sub>] – cyan, oxygen – red, nitrogen – blue, carbon – grey, hydrogen – white.

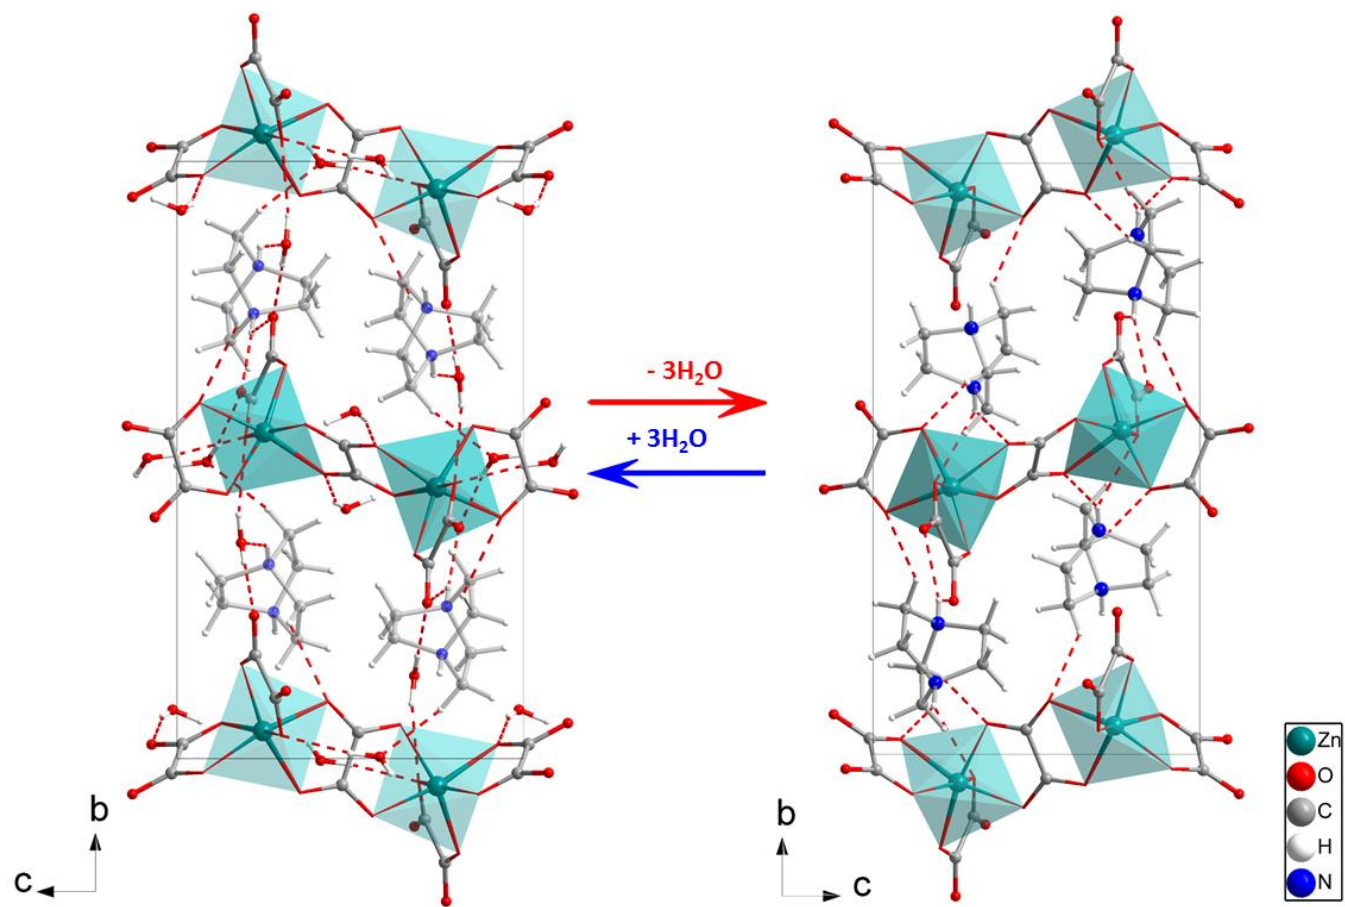

Figure S12. Schematic illustration of the single-crystal to single-crystal transformation between DZnOH and DZnO viewed along [100]. Colour key: [ZnO<sub>6</sub>] – cyan, oxygen – red, nitrogen – blue, carbon – grey, hydrogen – white.



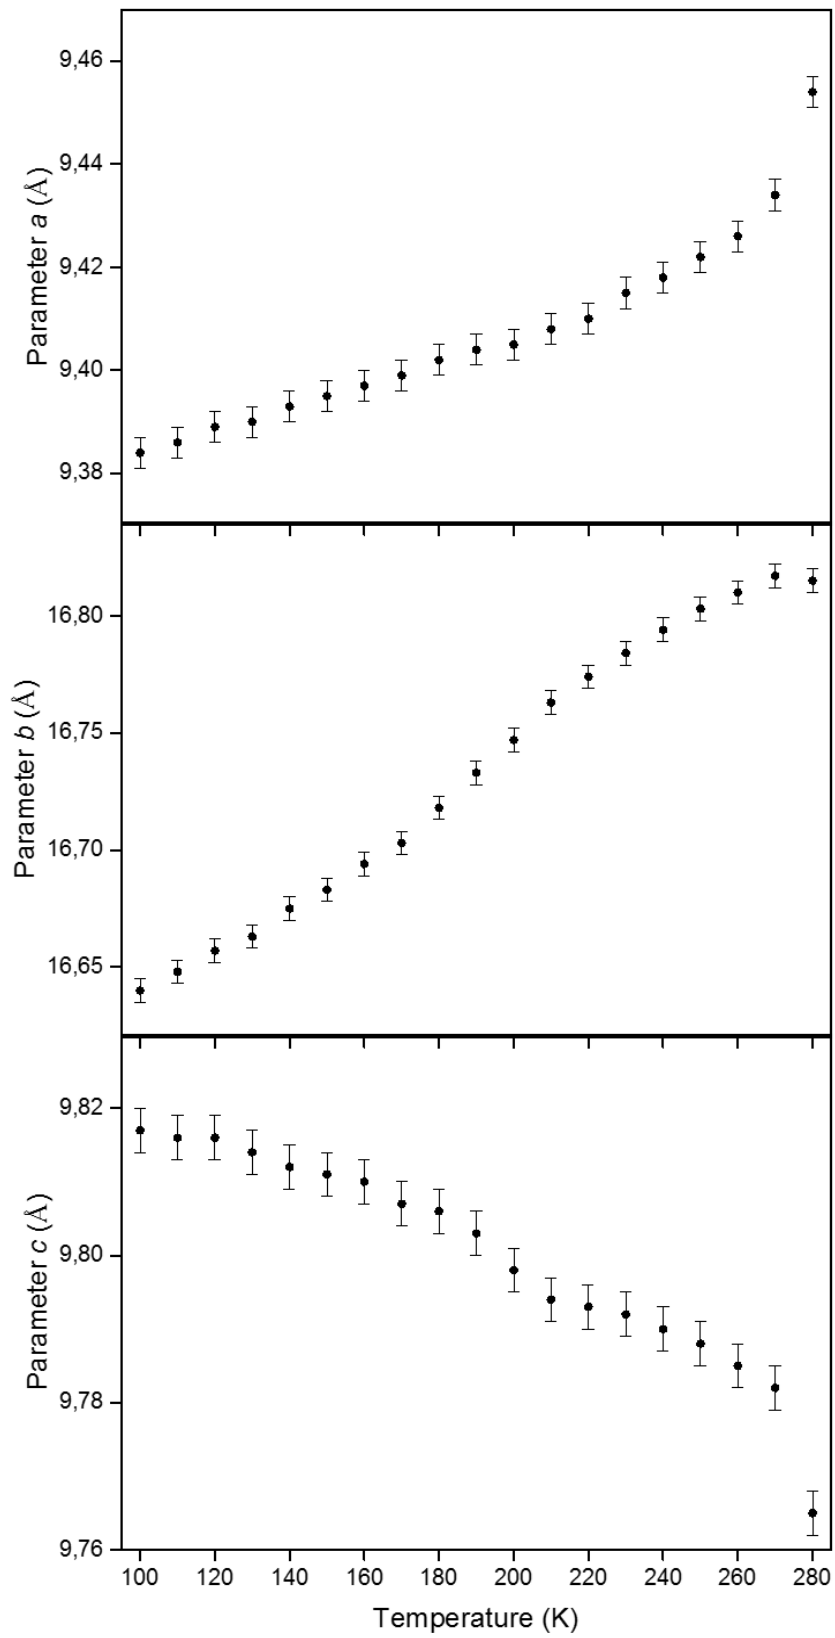

Figure S13. Thermal evolution of the monoclinic unit cell dimensions in DZnOH single crystal during heating.

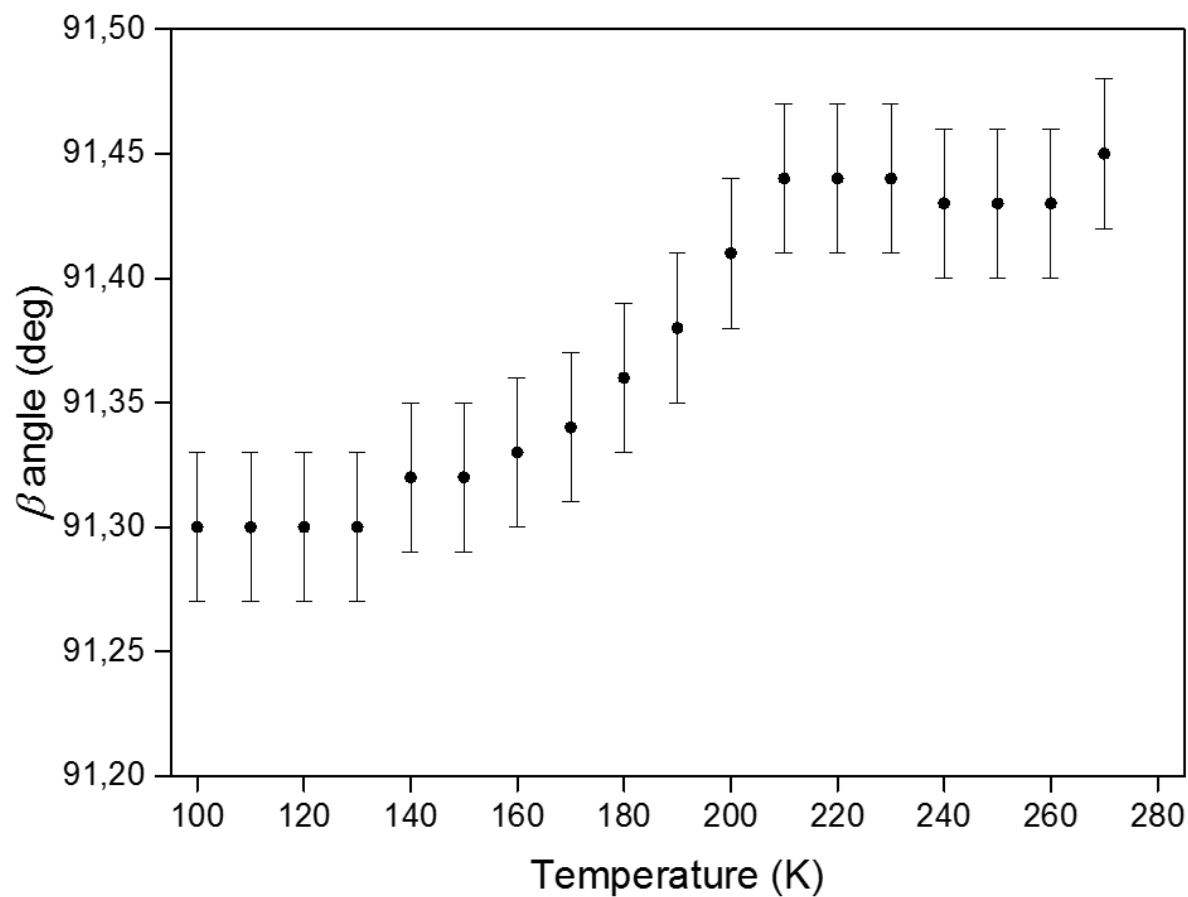

Figure S14. Thermal evolution of the monoclinic beta ( $\beta$ ) angle in DZnOH single crystal during heating.

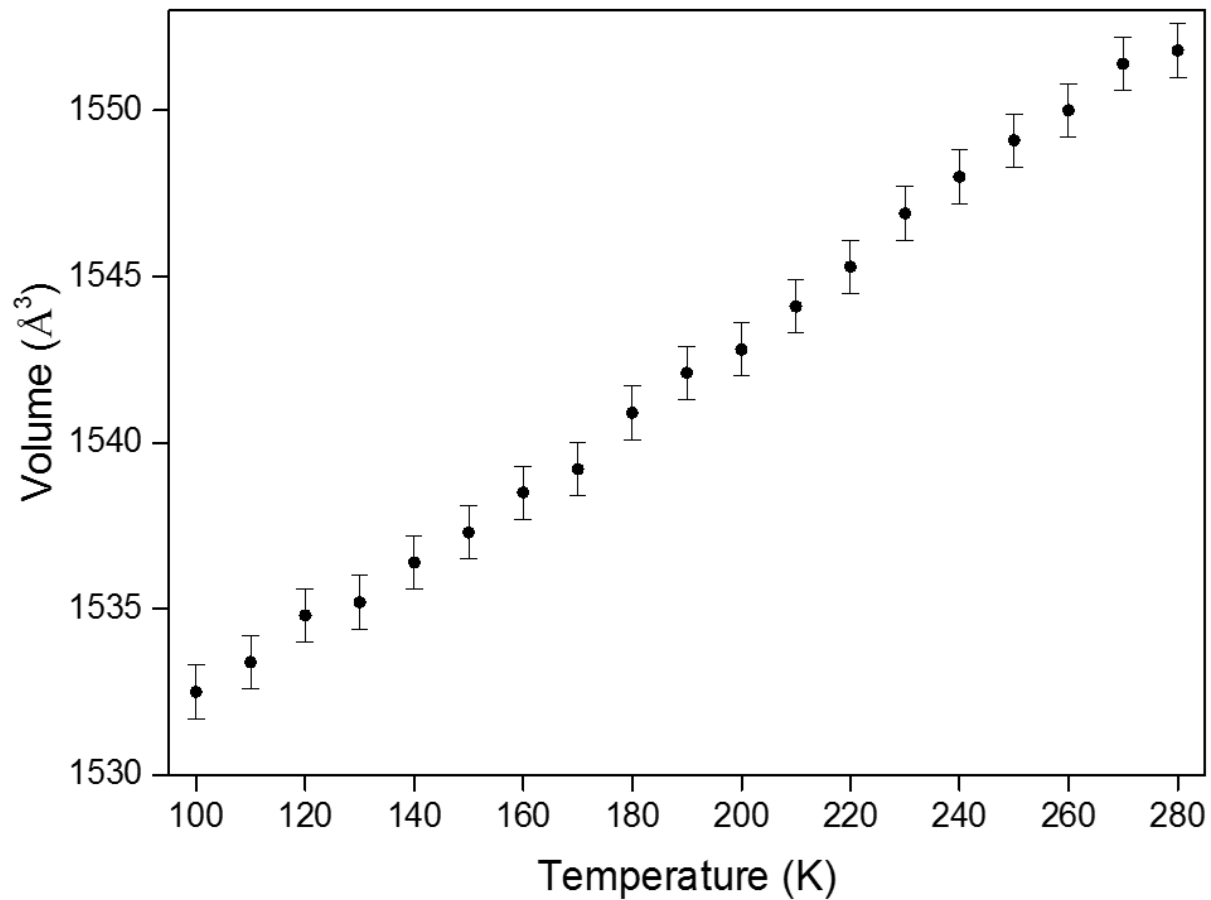

Figure S15. Thermal evolution of the unit cell volume in the DZnOH single crystals during heating.

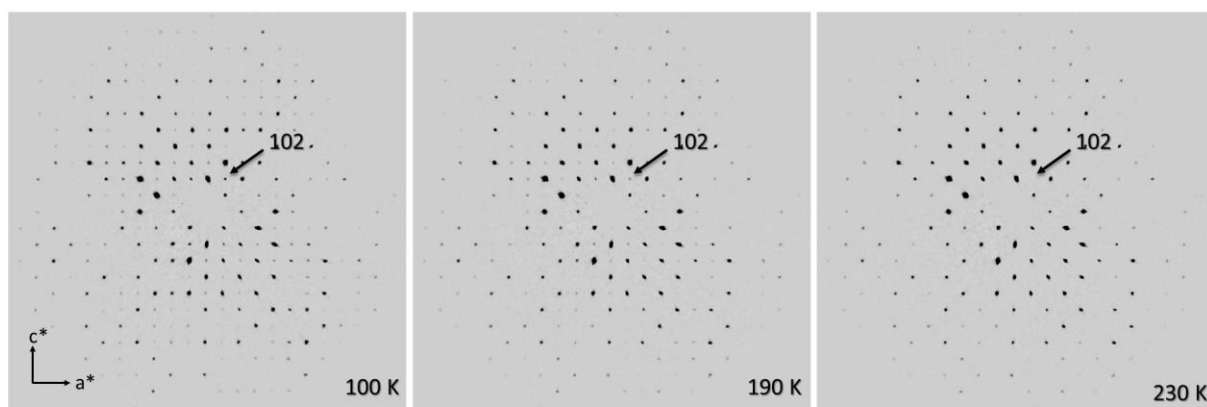

Figure S16. A reconstructed view of the  $h0l$  plane of reciprocal space for DZnOH at 100, 190 and 230 K. The appearance of diffraction intensity at reciprocal lattice below 200 K with

reflection condition ( $h + l = 2n + 1$ ) which arise due to loss of the  $n$  glide plane perpendicular to  $b$  axis.

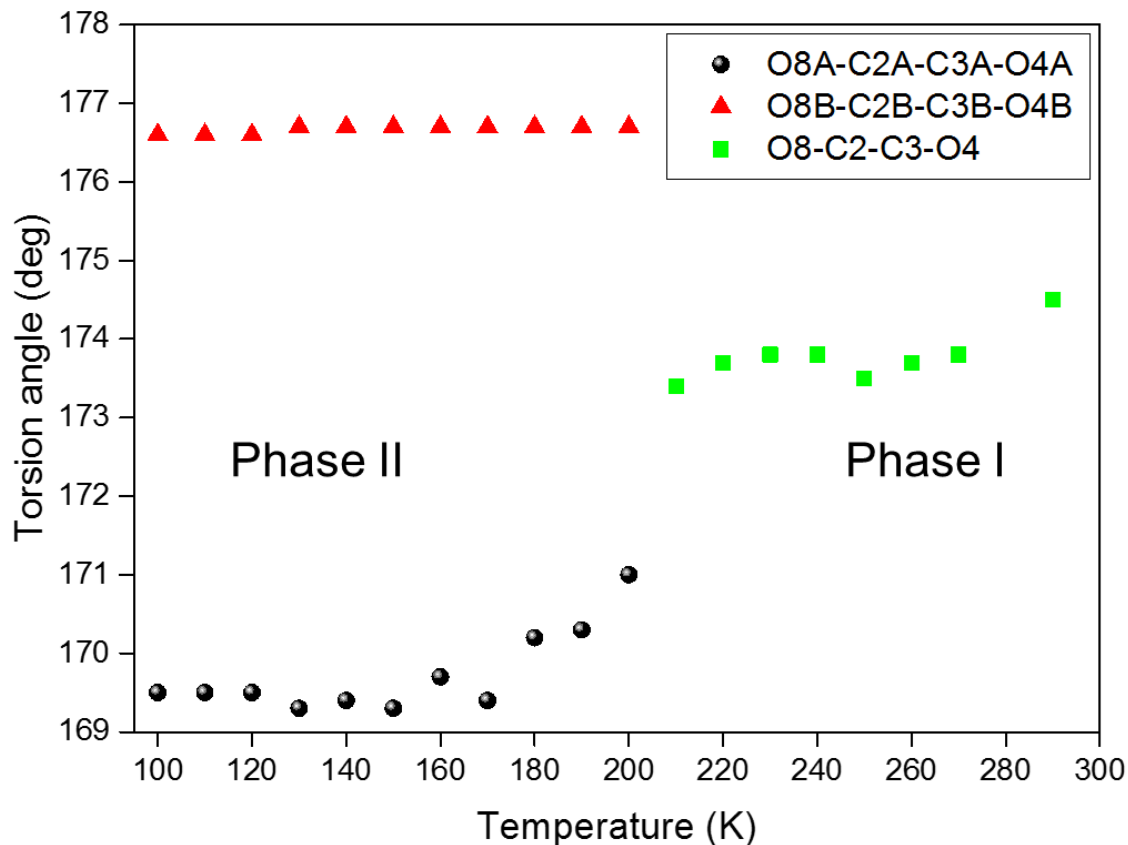

Figure S17. Torsion angle (O8-C2-C3-O4 for phase I, O8A-C2A-C3A-O4A and O8B-C2B-C3B-O4B for phase II) as a function of temperature in the DZnOH molecule.

Table S2. Atomic displacements from the high temperature phase positions.

| Atom | ux      | uy      | uz     | u      |
|------|---------|---------|--------|--------|
| Zn11 | -0.0035 | 0.0007  | 0.0057 | 0.0666 |
| Zn12 | 0.0002  | -0.0001 | 0.0070 | 0.0685 |
| O11  | -0.0044 | 0.0015  | 0.0057 | 0.0748 |
| O12  | -0.0020 | 0.0007  | 0.0057 | 0.0604 |
| O21  | -0.0055 | 0.0007  | 0.0064 | 0.0830 |
| O22  | -0.0003 | -0.0011 | 0.0059 | 0.0609 |
| O31  | -0.0057 | 0.0006  | 0.0019 | 0.0585 |
| O32  | -0.0045 | -0.0027 | 0.0026 | 0.0677 |
| O41  | -0.0029 | 0.0008  | 0.0069 | 0.0747 |
| O42  | -0.0017 | 0.0009  | 0.0077 | 0.0791 |
| O51  | -0.0050 | 0.0012  | 0.0055 | 0.0752 |
| O52  | -0.0020 | -0.0005 | 0.0064 | 0.0664 |

|      |         |         |         |        |
|------|---------|---------|---------|--------|
| O61  | -0.0020 | 0.0003  | 0.0070  | 0.0714 |
| O62  | -0.0023 | 0.0032  | 0.0027  | 0.0641 |
| C11  | -0.0031 | 0.0004  | 0.0054  | 0.0616 |
| C12  | -0.0041 | 0.0006  | 0.0045  | 0.0600 |
| C21  | -0.0062 | -0.0017 | -0.0103 | 0.1182 |
| C22  | -0.0071 | -0.0055 | -0.0115 | 0.1597 |
| C31  | -0.0059 | -0.0016 | -0.0036 | 0.0705 |
| C32  | -0.0056 | -0.0030 | -0.0041 | 0.0827 |
| C41  | -0.0043 | 0.0017  | 0.0061  | 0.0785 |
| C42  | -0.0020 | -0.0002 | 0.0053  | 0.0554 |
| O71  | -0.0098 | -0.0038 | -0.0096 | 0.1447 |
| O72  | -0.0117 | -0.0027 | -0.0099 | 0.1520 |
| O81  | -0.0132 | -0.0045 | -0.0283 | 0.3096 |
| O82  | -0.0145 | -0.0092 | -0.0316 | 0.3695 |
| O91  | -0.0073 | -0.0038 | 0.0012  | 0.0943 |
| O92  | -0.0061 | 0.0005  | 0.0019  | 0.0619 |
| O101 | -0.0074 | -0.0014 | 0.0093  | 0.1183 |
| O102 | -0.0106 | -0.0022 | 0.0066  | 0.1260 |
| O111 | -0.0111 | 0.0036  | 0.0008  | 0.1214 |
| O112 | -0.0180 | -0.0005 | 0.0021  | 0.1719 |
| N11  | -0.0031 | 0.0013  | 0.0068  | 0.0767 |
| N12  | -0.0058 | 0.0039  | 0.0140  | 0.1619 |
| N21  | -0.0074 | 0.0017  | -0.0103 | 0.1244 |
| N22  | -0.0023 | 0.0020  | -0.0062 | 0.0724 |
| C51  | 0.0011  | 0.0038  | -0.0022 | 0.0685 |
| C52  | 0.0003  | -0.0016 | -0.0003 | 0.0274 |
| C61  | 0.0041  | 0.0010  | 0.0049  | 0.0635 |
| C62  | 0.0024  | 0.0012  | 0.0178  | 0.1761 |
| C71  | -0.0013 | -0.0026 | 0.0039  | 0.0590 |
| C72  | 0.0011  | 0.0032  | 0.0028  | 0.0608 |
| C81  | 0.0000  | 0.0008  | -0.0142 | 0.1393 |
| C82  | 0.0035  | 0.0009  | -0.0008 | 0.0369 |
| C91  | -0.0149 | 0.0040  | 0.0033  | 0.1601 |
| C92  | -0.0187 | 0.0011  | 0.0085  | 0.1975 |
| C101 | -0.0192 | 0.0021  | -0.0074 | 0.1967 |
| C102 | -0.0120 | 0.0044  | -0.0031 | 0.1377 |

---

24.07.2017 Symmetry mode analysis

<http://www.cryst.ehu.es/cgi-bin/cryst/programs/nph-amplimodes> 7/8

NOTE:  $u_x$ ,  $u_y$  and  $u_z$  are given in relative units.  $|u|$  is the absolute distance given in Å.

Table S3. Detailed crystallographic data for hydrous, DZnOH and anhydrous, DZnO zinc oxalate.

| Chemical formula                                                                                               | C <sub>20</sub> H <sub>40</sub> N <sub>4</sub> O <sub>22</sub> Zn <sub>2</sub> | C <sub>10</sub> H <sub>20</sub> N <sub>2</sub> O <sub>11</sub> Zn | C <sub>10</sub> H <sub>14</sub> N <sub>2</sub> O <sub>8</sub> Zn |
|----------------------------------------------------------------------------------------------------------------|--------------------------------------------------------------------------------|-------------------------------------------------------------------|------------------------------------------------------------------|
| <i>M<sub>r</sub></i>                                                                                           | 819.30                                                                         | 409.65                                                            | 355.60                                                           |
| Crystal system, space group                                                                                    | Monoclinic, <i>P</i> 2 <sub>1</sub>                                            | Monoclinic, <i>P</i> 2 <sub>1</sub> / <i>n</i>                    | Monoclinic, <i>P</i> 2 <sub>1</sub> / <i>n</i>                   |
| Temperature (K)                                                                                                | 100                                                                            | 250                                                               | 300                                                              |
| <i>a</i> , <i>b</i> , <i>c</i> (Å)                                                                             | 9.384 (3)                                                                      | 9.422 (3)                                                         | 7.638 (3)                                                        |
|                                                                                                                | 16.640 (5)                                                                     | 16.803 (5)                                                        | 17.163 (5)                                                       |
|                                                                                                                | 9.817 (3)                                                                      | 9.788 (3)                                                         | 9.524 (3)                                                        |
| β (°)                                                                                                          | 91.30 (3)                                                                      | 91.43 (3)                                                         | 93.32 (3)                                                        |
| <i>V</i> (Å <sup>3</sup> )                                                                                     | 1532.5 (8)                                                                     | 1549.1 (8)                                                        | 1246.4 (7)                                                       |
| <i>Z</i>                                                                                                       | 2                                                                              | 4                                                                 | 4                                                                |
| Radiation type                                                                                                 | Mo <i>K</i> α                                                                  | Mo <i>K</i> α                                                     | Mo <i>K</i> α                                                    |
| μ (mm <sup>-1</sup> )                                                                                          | 1.67                                                                           | 1.65                                                              | 2.02                                                             |
| Crystal size (mm)                                                                                              | 0.28 × 0.18 × 0.13                                                             | 0.28 × 0.18 × 0.13                                                | 0.30 × 0.18 × 0.14                                               |
| Diffractometer                                                                                                 | Xcalibur, Atlas                                                                | Xcalibur, Atlas                                                   | Xcalibur, Atlas                                                  |
| Absorption correction                                                                                          |                                                                                | Analytical [2]                                                    |                                                                  |
| <i>T</i> <sub>min</sub> , <i>T</i> <sub>max</sub>                                                              | 0.709, 0.838                                                                   | 0.712, 0.838                                                      | 0.654, 0.800                                                     |
| No. of measured, independent and observed [ <i>I</i> > 2σ( <i>I</i> )] reflections                             | 11913, 5289, 4804                                                              | 11744, 3042, 2480                                                 | 8699, 2454, 1243                                                 |
| <i>R</i> <sub>int</sub>                                                                                        | 0.029                                                                          | 0.032                                                             | 0.079                                                            |
| (sin θ/λ) <sub>max</sub> (Å <sup>-1</sup> )                                                                    | 0.617                                                                          | 0.617                                                             | 0.617                                                            |
| Range of <i>h</i> , <i>k</i> , <i>l</i>                                                                        | <i>h</i> = -11→11                                                              | <i>h</i> = -11→11                                                 | <i>h</i> = -9→9                                                  |
|                                                                                                                | <i>k</i> = -20→20                                                              | <i>k</i> = -20→20                                                 | <i>k</i> = -21→21                                                |
|                                                                                                                | <i>l</i> = -12→12                                                              | <i>l</i> = -12→12                                                 | <i>l</i> = -11→11                                                |
| <i>R</i> [ <i>F</i> <sup>2</sup> > 2σ( <i>F</i> <sup>2</sup> )], <i>wR</i> ( <i>F</i> <sup>2</sup> ), <i>S</i> | 0.031, 0.068, 1.05                                                             | 0.033, 0.076, 1.07                                                | 0.061, 0.140, 0.97                                               |
| No. of reflections                                                                                             | 5289                                                                           | 3042                                                              | 2454                                                             |
| No. of parameters                                                                                              | 421                                                                            | 202                                                               | 190                                                              |
| No. of restraints                                                                                              | 1                                                                              |                                                                   |                                                                  |
| H-atom treatment                                                                                               |                                                                                | H-atom parameters constrained                                     |                                                                  |
| Δρ <sub>max</sub> , Δρ <sub>min</sub> (e Å <sup>-3</sup> )                                                     | 0.37, -0.43                                                                    | 0.36, -0.52                                                       | 0.55, -0.56                                                      |
| Absolute structure                                                                                             | Refined as a perfect inversion twin.                                           |                                                                   |                                                                  |
| Absolute structure parameter                                                                                   | 0.5                                                                            |                                                                   |                                                                  |

Table S4. The geometries of the O-H $\cdots$ O, N-H $\cdots$ O and C-H $\cdots$ O hydrogen bonds between the water molecules, the doubly protonated 1,4-diazabicyclo-[2.2.2]-octane and the anionic metal oxalate chains (distances, Å; angles, °) in the phase I and II of hydrous, DZnOH and anhydrous, DZnO zinc oxalate.

| <i>D</i> —H $\cdots$ <i>A</i>                                                                                                                                                | <i>D</i> —H (Å) | H $\cdots$ <i>A</i> (Å) | <i>D</i> $\cdots$ <i>A</i> (Å) | <i>D</i> —H $\cdots$ <i>A</i> (°) |
|------------------------------------------------------------------------------------------------------------------------------------------------------------------------------|-----------------|-------------------------|--------------------------------|-----------------------------------|
| <b>(DABCOH<sub>2</sub>)[Zn(C<sub>2</sub>O<sub>4</sub>)<sub>2</sub>]·3H<sub>2</sub>O, DZnOH</b>                                                                               |                 |                         |                                |                                   |
| <b><i>P</i>2<sub>1</sub>, 100 K</b>                                                                                                                                          |                 |                         |                                |                                   |
| N1A—H1A $\cdots$ O9A <sup>i</sup>                                                                                                                                            | 1.00            | 2.30                    | 2.956 (7)                      | 121.8                             |
| N1A—H1A $\cdots$ O10A                                                                                                                                                        | 1.00            | 1.95                    | 2.750 (7)                      | 135.1                             |
| N2A—H2A $\cdots$ O8A <sup>ii</sup>                                                                                                                                           | 1.00            | 1.94                    | 2.759 (7)                      | 137.8                             |
| N2A—H2A $\cdots$ O7A <sup>ii</sup>                                                                                                                                           | 1.00            | 2.05                    | 2.858 (6)                      | 136.0                             |
| O9A—H9AD $\cdots$ O9B <sup>iii</sup>                                                                                                                                         | 0.85            | 2.08                    | 2.911 (5)                      | 166.8                             |
| O9A—H9AC $\cdots$ O6B <sup>iv</sup>                                                                                                                                          | 0.85            | 2.07                    | 2.898 (6)                      | 163.1                             |
| O10A—H10E $\cdots$ O3A <sup>i</sup>                                                                                                                                          | 0.85            | 2.17                    | 2.952 (6)                      | 152.8                             |
| O10A—H10F $\cdots$ O7A                                                                                                                                                       | 0.85            | 2.00                    | 2.836 (7)                      | 165.8                             |
| O11A—H11B $\cdots$ O8A                                                                                                                                                       | 0.85            | 1.94                    | 2.793 (6)                      | 177.7                             |
| O11A—H11A $\cdots$ O3B <sup>v</sup>                                                                                                                                          | 0.85            | 2.06                    | 2.842 (6)                      | 152.3                             |
| C6A—H6AA $\cdots$ O5B                                                                                                                                                        | 0.99            | 2.39                    | 3.017 (7)                      | 120.3                             |
| C7A—H7AB $\cdots$ O11A <sup>i</sup>                                                                                                                                          | 0.99            | 2.22                    | 3.135 (9)                      | 152.3                             |
| N1B—H1B $\cdots$ O10B                                                                                                                                                        | 1.00            | 1.80                    | 2.694 (7)                      | 147.6                             |
| N2B—H2B $\cdots$ O8B <sup>v</sup>                                                                                                                                            | 1.00            | 1.74                    | 2.639 (7)                      | 147.8                             |
| N2B—H2B $\cdots$ O7B <sup>v</sup>                                                                                                                                            | 1.00            | 2.27                    | 2.977 (5)                      | 126.9                             |
| O9B—H9BC $\cdots$ O8A <sup>viii</sup>                                                                                                                                        | 0.85            | 2.08                    | 2.930 (6)                      | 173.8                             |
| O9B—H9BD $\cdots$ O6A <sup>vii</sup>                                                                                                                                         | 0.85            | 1.95                    | 2.802 (6)                      | 175.0                             |
| O10B—H10G $\cdots$ O3B <sup>vi</sup>                                                                                                                                         | 0.85            | 2.11                    | 2.958 (5)                      | 171.7                             |
| O10B—H10H $\cdots$ O7B                                                                                                                                                       | 0.85            | 2.02                    | 2.819 (5)                      | 157.6                             |
| O11B—H11C $\cdots$ O8B                                                                                                                                                       | 0.85            | 1.95                    | 2.791 (5)                      | 168.5                             |
| O11B—H11D $\cdots$ O3A <sup>ii</sup>                                                                                                                                         | 0.85            | 1.98                    | 2.805 (5)                      | 164.8                             |
| C6B—H6BB $\cdots$ O5A                                                                                                                                                        | 0.99            | 2.44                    | 2.981 (8)                      | 113.5                             |
| C7B—H7BA $\cdots$ O11B <sup>vi</sup>                                                                                                                                         | 0.99            | 2.27                    | 3.085 (8)                      | 138.8                             |
| <b>Symmetry code(s): (i) -x+1, y+1/2, -z+2; (ii) x-1, y, z; (iii) x+1, y, z+1; (iv) x, y, z+1; (v) x+1, y, z; (vi) -x, y-1/2, -z+1; (vii) x, y, z-1; (viii) x-1, y, z-1.</b> |                 |                         |                                |                                   |
| <b><i>P</i>2<sub>1</sub>/<i>n</i>, 250 K</b>                                                                                                                                 |                 |                         |                                |                                   |
| N1—H1 $\cdots$ O10                                                                                                                                                           | 0.98            | 1.88                    | 2.727 (2)                      | 143.3                             |
| N2—H2 $\cdots$ O7 <sup>iv</sup>                                                                                                                                              | 0.98            | 2.20                    | 2.945 (2)                      | 132.1                             |

|                              |      |      |           |       |
|------------------------------|------|------|-----------|-------|
| N2—H2···O8 <sup>iv</sup>     | 0.98 | 1.83 | 2.687 (2) | 143.9 |
| O9—H9C···O6 <sup>i</sup>     | 0.85 | 2.04 | 2.868 (3) | 162.5 |
| O10—H10D···O3 <sup>ii</sup>  | 0.85 | 2.19 | 3.001 (3) | 159.4 |
| O10—H10C···O7                | 0.85 | 1.99 | 2.836 (3) | 172.1 |
| O11—H11A···O3 <sup>iii</sup> | 0.85 | 2.01 | 2.837 (3) | 163.9 |
| O11—H11B···O8                | 0.85 | 1.94 | 2.760 (2) | 162.0 |
| C6—H6B···O5 <sup>v</sup>     | 0.97 | 2.48 | 3.038 (2) | 116.1 |
| C7—H7A···O11 <sup>ii</sup>   | 0.97 | 2.31 | 3.167 (3) | 146.4 |

Symmetry code(s): (i) -x, -y+1, -z+1; (ii) -x+1/2, y-1/2, -z+1/2; (iii) -x+1, -y+1, -z; (iv) x-1, y, z; (v) -x, -y+1, -z

**(DABCOH<sub>2</sub>)[Zn(C<sub>2</sub>O<sub>4</sub>)<sub>2</sub>], DZnO**

***P2<sub>1</sub>/n*, 300 K**

|                           |      |      |           |       |
|---------------------------|------|------|-----------|-------|
| C5—H5A···O5 <sup>i</sup>  | 0.97 | 2.28 | 3.073 (8) | 138.2 |
| C8—H8B···O2 <sup>ii</sup> | 0.97 | 2.25 | 3.169 (8) | 158.6 |
| N1—H1···O3 <sup>iii</sup> | 0.98 | 2.40 | 3.027 (7) | 120.9 |
| N1—H1···O6 <sup>iv</sup>  | 0.98 | 1.89 | 2.784 (6) | 150.7 |
| N2—H2···O7 <sup>v</sup>   | 0.98 | 1.96 | 2.741 (7) | 134.9 |
| N2—H2···O8 <sup>v</sup>   | 0.98 | 2.15 | 2.995 (7) | 142.9 |

**Symmetry codes:** (i) -x, -y+1, -z+2; (ii) -x-1/2, y+1/2, -z+3/2; (iii) -x+1/2, y+1/2, -z+3/2; (iv) x+1/2, -y+3/2, z+1/2; (v) x-1, y, z.

Table S5. Selected bond distances (Å) and bond angles (°) in hydrous, DZnOH and anhydrous, DZnO zinc oxalate.

**(DABCOH<sub>2</sub>)[Zn(C<sub>2</sub>O<sub>4</sub>)<sub>2</sub>], DZnO**

| Parameter                                      | 100 K, <i>P2<sub>1</sub>/n</i> | 300 K, <i>P2<sub>1</sub>/n</i> |
|------------------------------------------------|--------------------------------|--------------------------------|
| Zn—O                                           | 2.066 (2) - 2.144 (3)          | 2.063 (4) - 2.157 (4)          |
| C—O                                            | 1.234 (4)-1.275 (4)            | 1.225 (7) - 1.274 (8)          |
| C—N                                            | 1.488 (4) - 1.502 (4)          | 1.469 (7) - 1.501 (7)          |
| C—C                                            | 1.520 (6) - 1.563 (6)          | 1.509 (9) - 1.544 (12)         |
| O—Zn—O                                         | 77.43 (9) - 168.77 (11)        | 77.27 (15) - 168.08 (17)       |
| O—C—O                                          | 125.2 (4) - 126.9 (4)          | 124.3 (7) - 128.0 (7)          |
| N—C—C                                          | 108.3 (3) - 108.8 (3)          | 107.9 (5) - 109.2 (5)          |
| O—C—C                                          | 115.4 (4) - 117.8 (4)          | 114.7 (6) - 117.3 (7)          |
| C—N—C                                          | 109.7 (3) - 110.7 (3)          | 109.2 (5) - 111.6 (5)          |
| Zn—O—C                                         | 112.4 (2) - 114.6 (2)          | 111.9 (4) - 114.5 (4)          |
| Zn—C <sub>2</sub> O <sub>4</sub> —Zn (Zn···Zn) | 5.461 (2) – 5.580 (2)          | 5.473 (2) – 5.598 (2)          |



**(DABCOH<sub>2</sub>)[Zn(C<sub>2</sub>O<sub>4</sub>)<sub>2</sub>]·3H<sub>2</sub>O, DZnOH**

| <b>Parameter</b>                               | <b>100 K, P2<sub>1</sub></b> | <b>250 K, P2<sub>1/n</sub></b> |
|------------------------------------------------|------------------------------|--------------------------------|
| Zn–O                                           | 2.0682 (15) - 2.143 (3)      | 2.079 (2) - 2.139 (2)          |
| C–O                                            | 1.243 (6) - 1.263 (6)        | 1.235 (4) - 1.261 (3)          |
| C–N                                            | 1.482 (7) - 1.514 (8)        | 1.480 (8) - 1.491 (3)          |
| C–C                                            | 1.514 (9) - 1.543 (9)        | 1.511 (5) - 1.560 (5)          |
| O–Zn–O                                         | 79.77 (10) - 171.89 (16)     | 79.20 (7) - 170.01 (7)         |
| O–C–O                                          | 125.6 (5) - 126.6 (5)        | 125.5 (3) - 126.6 (3)          |
| N–C–C                                          | 107.3 (5) - 108.7 (5)        | 108.1 – 108.6                  |
| O–C–C                                          | 115.18 (17) - 118.50 (17)    | 115.8 (2) - 117.6 (2)          |
| C–N–C                                          | 108.4 (5) - 110.5 (4)        | 109.1 (..) - 110.4 (...)       |
| Zn–O–C                                         | 112.2 (3) - 114.4 (3)        | 112.73 (15) - 114.19 (15)      |
| Zn–C <sub>2</sub> O <sub>4</sub> –Zn (Zn···Zn) | 5.428 (2) – 5.475 (2)        | 5.443 (2) - 5.478 (2)          |

<sup>1</sup> Hensch, H. K., *Crystals in Gels and Liesegang Rings*. Cambridge University Press, Cambridge, 1988.

<sup>2</sup> Clark, R. C., Reid, J. S., *Acta Cryst.* A51, 1995, 887.
